# Supplementary material
Source: publisher site journal article supplement (https://www.dovepress.com/article/300047)
Supplement: Supplementary file 1 [file get_supplementary_file.php]

Supplementary Table 1. Analysis of the correlation between the grade of MMP-9 and DED parameters (SANDE, TBUT, and OSS) in MMP-9 positive subjects at first visit.

|  | **R** | **P value*** |
| --- | --- | --- |
| **SANDE** | 0.061 | 0.548 |
| **TBUT** | -0.013 | 0.897 |
| **OSS** | 0.355 | <0.001 |
| **MGD stage** | -0.027 | 0.793 |

DED: dry eye disease; SANDE: symptom assessment in dry eye; TBUT: tear film breakup time; OSS: ocular staining score; MGD: meibomian gland dysfunction. *Pearson correlation analysis.

Supplementary Table 2. Distribution of symptom improvement score and changes in SANDE score according to tear MMP-9 positivity after topical CS treatment.

|  | **MMP-9 positive**  **(n=100, 73.0%)** | **MMP-9 negative**  **(n=37, 27.0%)** | ***P* value*** |
| --- | --- | --- | --- |
| ***Symptom Improvement Score*** | | | |
| Complete Improvement | 27 | 6 | 0.041 |
| Partial Improvement | 52 | 17 |
| No change | 21 | 14 |
| ***Changes in SANDE score*** | | | |
| Reduction | 94 | 30 | 0.022 |
| No change or Increase | 6 | 7 |

MMP-9: Matrix Metalloproteinase 9; SANDE: symptom assessment in dry eye; *: Chi-square test

Supplementary Table 3. Comparison of the therapeutic effects of topical CS based on the grade of MMP-9 positivity in tear films (grades 1-2 versus grades 3-4)

| Changes in  DED parameters | Tear MMP-9(+) | |  |
| --- | --- | --- | --- |
| Grades 1 and 2  (n=78) | Grades 3 and 4  (n=22) | *P*-value‡ |
| SANDE (post-pre) | -27.5819.94 | -26.2116.31 | 0.768 |
| TBUT (post-pre) | 1.31.4 | 1.51.1 | 0.732 |
| OSS (post-pre) | -0.30.5 | -0.50.7 | 0.221 |
| MGD stage (post-pre) | -0.60.6 | -0.70.6 | 0.447 |
| Symptom change score | 1.10.7 | 1.10.6 | 0.796 |

DED, dry eye disease; SANDE, symptom assessment in dry eye; TBUT, tear film breakup time; OSS, ocular staining score. ‡Mann-Whitney U test.
